# Supplementary material for: Relationship between low-Q peak and long-range ordering of ionic liquids revealed by high-energy X-ray total scattering
Source: Royal Society of Chemistry journal article supplement (doi:10.1039/c5cp01760b), 2015-01-01
Supplement: c5cp01760b1.pdf [file c5cp01760b1.pdf]

## Electronic Supplementary Information

### Relationship between Low-Q Peak and Long-range Ordering of Ionic Liquids Revealed by High-energy X-ray Total Scattering

Kenta Fujii,<sup>\*a</sup> Shinji Kohara,<sup>b</sup> and Yasuhiro Umebayashi<sup>\*c</sup>

<sup>a</sup> Graduate School of Science and Engineering, Yamaguchi University, 2-16-1 Tokiwadai, Ube, Yamaguchi 755-8611, Japan. E-mail: k-fujii@yamaguchi-u.ac.jp

<sup>b</sup> Japan Synchrotron Radiation Research Institute (JASRI), Sayo-cho, Sayo-gun, Hyogo 679-5198, Japan.

<sup>c</sup> Graduate School of Science and Technology Niigata University, 8050 Ikarashi, 2-no-cho, Nishi-ku, Niigata City, 950-2181, Japan.

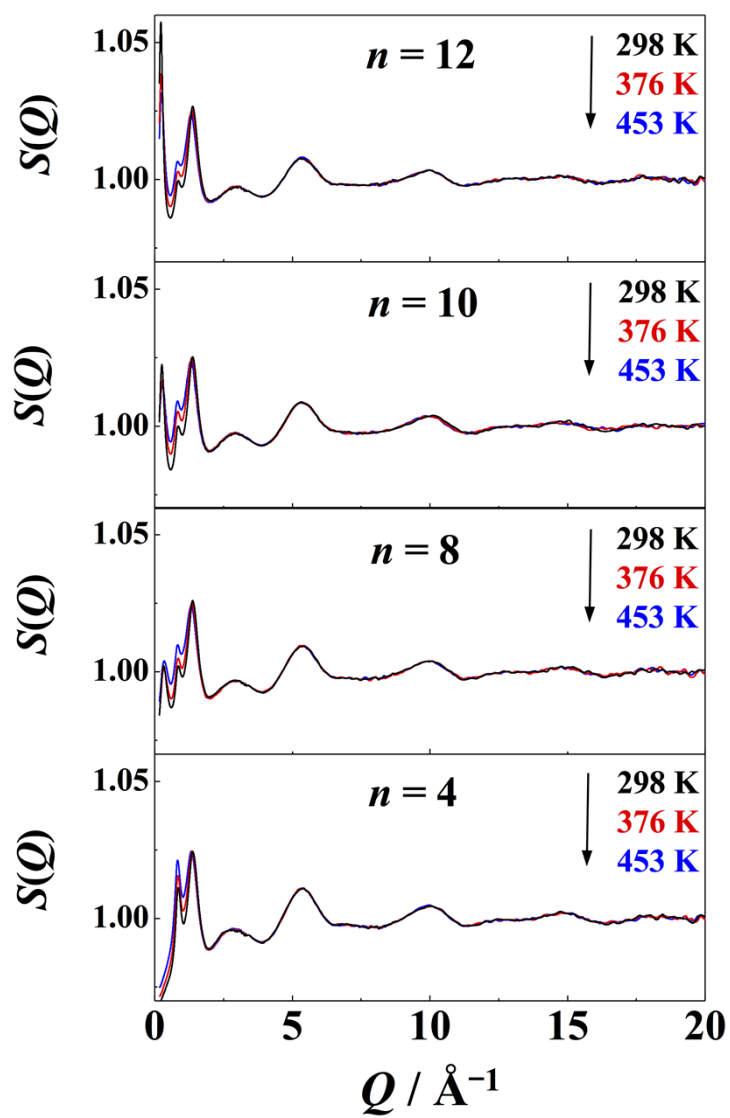

**Figure S1.** Temperature dependences of  $S(Q)$ s for  $[\text{C}_n\text{mIm}^+][\text{TFSA}^-]$ s with  $n = 4, 8, 10$  and  $12$  in the  $Q$ -range of  $0 \sim 25 \text{\AA}^{-1}$ .
